# Supplementary material
Source: PubMed Central journal article supplement (PMC5477618)
Supplement: 2016_160507-Disclosures_and_Contributions.pdf [file 2016_160507-Disclosures_and_Contributions.pdf]

Haematologica  
HAEMATOL/2016/160507  
Version 4

Hyperlipidemia is a risk factor for osteonecrosis in children and young adults with acute lymphoblastic leukemia.

Signe Sloth Mogensen, Kjeld Schmiegelow, Kathrine Grell, Birgitte Klug Albertsen, Peder Skov Wehner, Peter Kampmann, and Thomas Leth Frandsen

Disclosures: none

Contributions: SSM had the primary responsibility for manuscript preparation and data analysis. SSM, BKA, PSW, PK, KS and TLF contributed to the study design and data collection. SSM, KG, TLF and KS have been responsible for data analysis. All authors cooperated in the manuscript writing and all approved the final manuscript.
